# Supplementary material for: Distinct mechanisms regulate Cdx2 expression in the blastocyst and in trophoblast stem cells
Source: PubMed Central journal article supplement (PMC4891713; doi:10.1038/srep27139), 2016-06-03
Supplement: srep27139-s1.pdf [file srep27139-s1.pdf]

## **Supplementary information**

### **Distinct mechanisms regulate Cdx2 expression in the blastocyst and in trophoblast stem cells**

Teresa Rayon, Sergio Menchero, Isabel Rollán, Inmaculada Ors, Anne Helness, Miguel Crespo, Andres Nieto, Véronique Azuara, Janet Rossant and Miguel Manzanares.

The following figures and tables are included as Supplementary Information

**Supplementary Figure S1.** Characterization of reporter expression in TEE transgenic lines and of the trophoblast outgrowth model.

**Supplementary Figure S2.** Characterization of TS<sub>L</sub> and TS<sub>R</sub> cells.

**Supplementary Figure S3.** ZHBTc4 cell line characterization.

**Supplementary Table S1.** Table with results of transgenic assays.

**Supplementary Table S2.** List of qPCR primers for RNA expression and for CHIP-qPCR experiments.

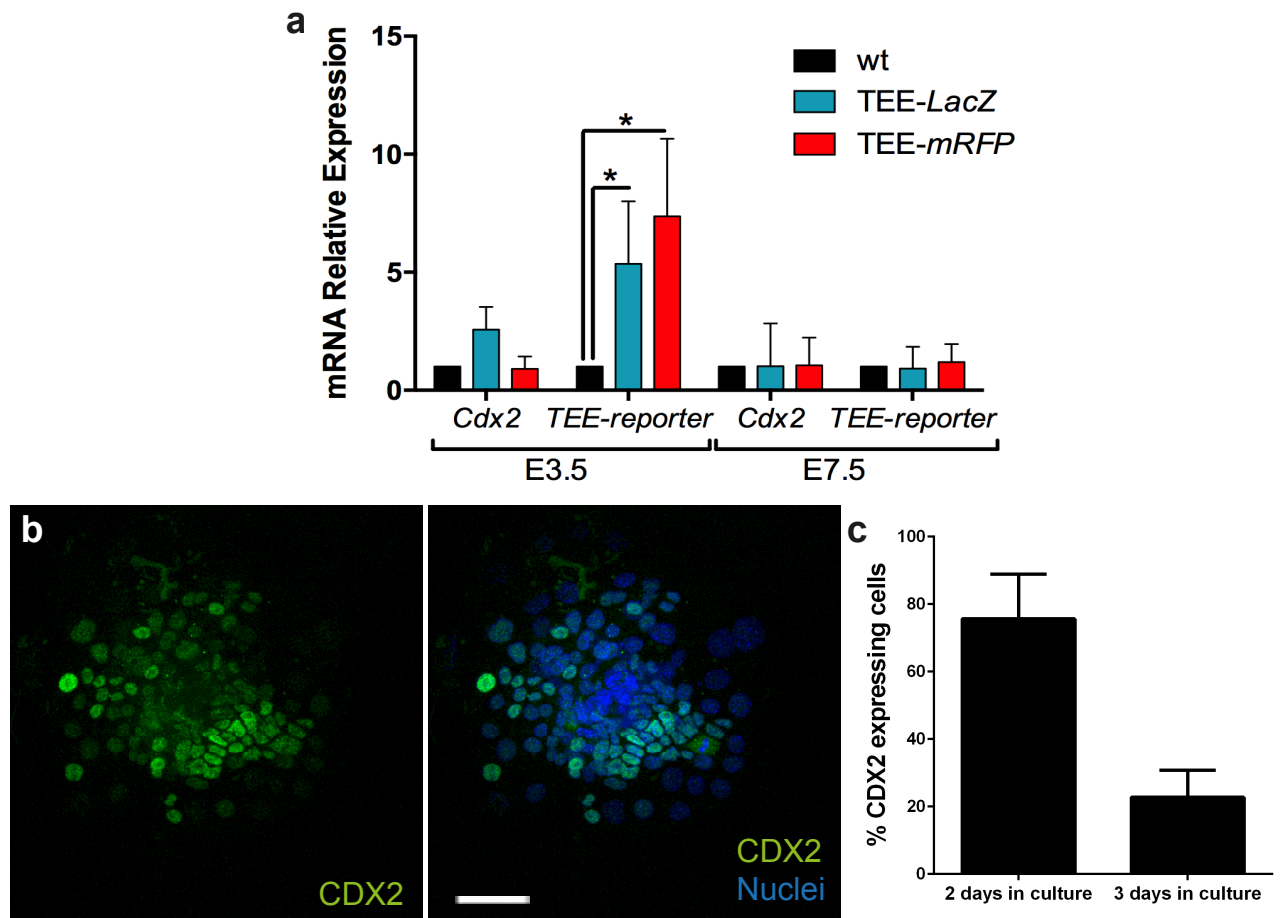

**Supplementary Figure S1. Characterization of reporter expression in TEE transgenic lines and of the trophoblast outgrowth model.**

(a) mRNA relative expression of *Cdx2*, *LacZ* and *mRFP* in E3.5 and the ExE of E7.5 TEE-LacZ and TEE-mRFP embryos, respectively. Data are means  $\pm$  s.e.m.  $n=3$ . \* $p<0.05$  compared with wild-type sibling embryos (Student's t-test). (b) Immunostaining for CDX2 (green) of an outgrowth cultured for two days. Nuclei are counterstained with DAPI. Scale bar 50 $\mu$ m. (c) Percentage of CDX2 expressing cells in outgrowths grown for two or three days.

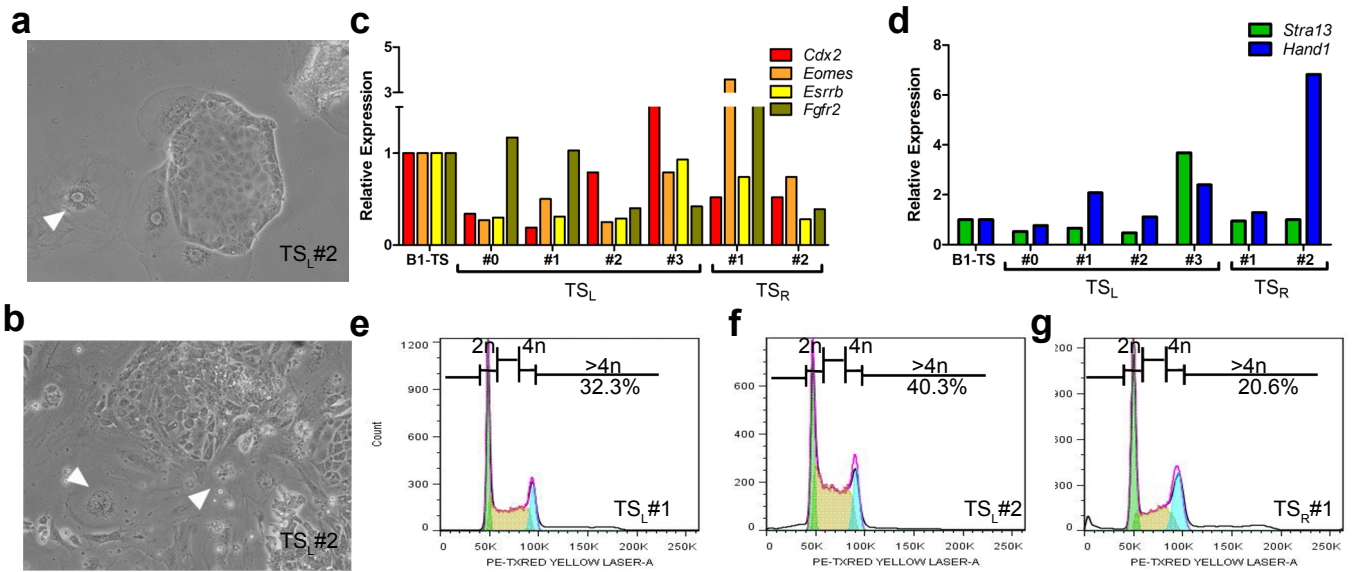

**Supplementary Figure S2. Characterization of  $TS_L$  and  $TS_R$  cells.**

(a) Representative  $TS_L$  epithelial colony in early passages. (b)  $TS_L$  clone upon FGF4 removal subjected to differentiation. Arrowheads point to differentiated cells. (c-d) Relative expression of (c)  $TS_L$  pluripotency and (d) differentiation markers in  $TS_L$  (#0-#3) and  $TS_R$  (#1-#2) clones.  $TS_L$  #0 was genotyped as *lacZ* negative. (e-g) DNA content in different (e, f)  $TS_L$  and (g)  $TS_R$  clones. DNA content is represented by the propidium iodide intensity.

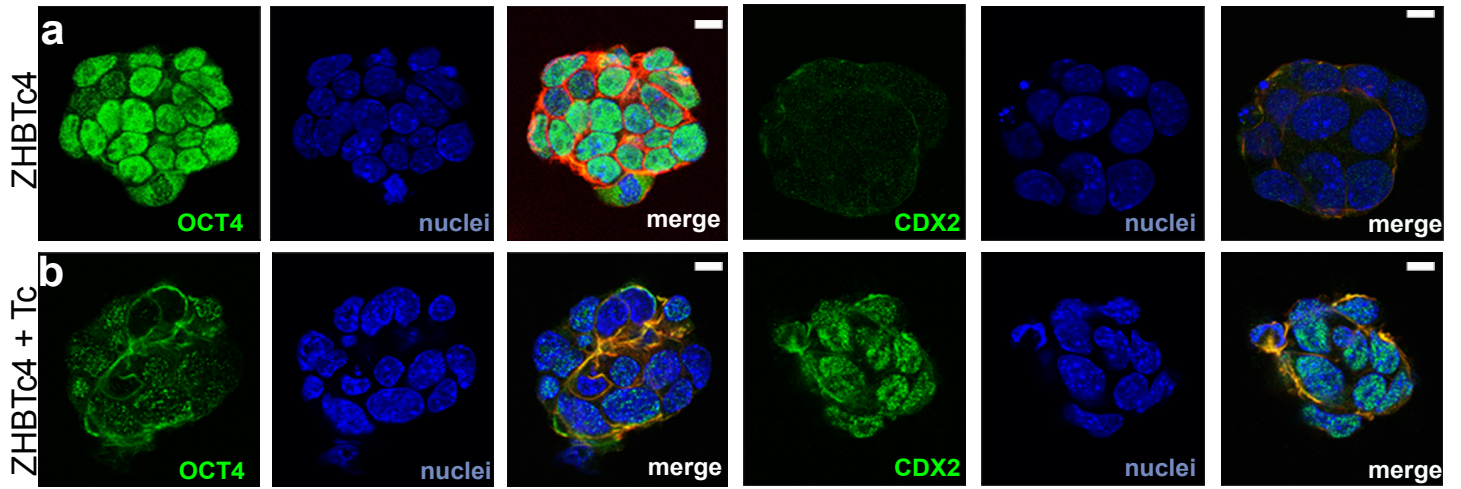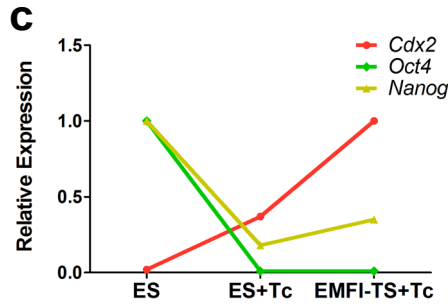

**Supplementary Figure S3. ZHBTc4 cell line characterization.**

(a, b) OCT4 (green) and CDX2 (green) expression in ZHBTc4 cell line in (a) ES medium or (b) upon tetracycline induction in EMFI-TS medium (Tc, 48h). Nuclei (blue) were stained with DAPI and F-actin with Rhodamine-phalloidin (red) to detect cell membrane. Scale bars, 20mm (c) Relative expression of Cdx2, Oct4 and Nanog in the ZHBTc4 cell line in different culture conditions with and without Tc.

**SUPPLEMENTARY TABLE S1**

|          |           | stage                   |            |                         |                         |        |                         |
|----------|-----------|-------------------------|------------|-------------------------|-------------------------|--------|-------------------------|
|          |           | E3.5                    |            |                         | E7.5                    |        |                         |
| fragment | size (kb) | n reporter <sup>+</sup> | n embryos* | % reporter <sup>+</sup> | n reporter <sup>+</sup> | n tg** | % reporter <sup>+</sup> |
| #1       | 0.5       | 33                      | 175        | 18.9%                   | 1                       | 11     | 9.1%                    |
| #2       | 1.8       | 8                       | 73         | 10%                     | 2                       | 6      | 33.3%                   |
| #3       | 4.4       | 54                      | 126        | 42.9%                   | 5                       | 16     | 31.2%                   |

\* includes all embryos reaching the blastocyst stage after microinjection

\*\* includes all transgenic embryos identified by PCR genotyping

## SUPPLEMENTARY TABLE S2

### RT-qPCR primers

| Gene          | forward primer             | reverse primer             |
|---------------|----------------------------|----------------------------|
| <i>Actin</i>  | CAGAAGGAGATTACTGCTCTGGCT   | TACTCCTGCTTGCTGATCCACAT    |
| <i>Cdx2</i>   | TCAACCTCGCCACAACCTTCCC     | TGGCTCAGCCTGGGATTGCT       |
| <i>Eomes</i>  | TTCACCTTCTCAGAGACACAGTTCAT | GAGTTAACCTGTCATTTTCTGAAGCC |
| <i>Esrrb</i>  | GGACACACTGCTTTGAAGCA       | ACAGATGTCTCTCATCTGGC       |
| <i>Fgfr2</i>  | GAGGAATACTTGGATCTACC       | CTGGTGCTGTCTGTTTGGG        |
| <i>Gata3</i>  | GGTTTCGGATGTAAGTCGAG       | CCACAGTGGGGTAGAGTTG        |
| <i>Hand1</i>  | TGCACAAGCAGGTGACCCCG       | CCCTTTAATCCTCTTCTCGCCG     |
| <i>Nanog</i>  | CTTACAAGGTCTGCTACTGAGATGC  | TGCTTCTGGCAAGGACCTT        |
| <i>Oct4</i>   | ATCAGCTTGGGCTAGAGAAGGATG   | AAAGGTGTCCCTGTAGCCTCATACT  |
| <i>Stra13</i> | GGTGAGCAGACTACTCCATTT      | GTGCCCCACATATTTCCCCAC      |
| <i>Ywhaz</i>  | CGTTGTAGGAGCCCGTAGGTCAT    | TCTGGTTGCGAAGCATTGGG       |
| <i>mRFP-1</i> | GCAGAAGAAGACCATGGGCT       | TGTCCAGCTTGATGTCCGGTC      |
| <i>LacZ</i>   | TTCAACATCAGCCGCTACAG       | CGTCGATATTCAGCCATGTG       |

### ChIP –qPCR primers

| Region                |    | forward primer            | reverse primer            |
|-----------------------|----|---------------------------|---------------------------|
| <i>Actin promoter</i> |    | CCCCAACACACCTAGCAAAT      | ACTGCCCCATTCAATGTCTC      |
| <i>Nanog promoter</i> |    | CCCAGGTTTCCCAATGTGAAG     | AAAGAGTCAGACCTTGCTGCCA    |
| <i>Cdx2 promoter</i>  |    | CTCGACGTCTCCAGCCATTGGT    | CCAGCGGCCTTACGTGATTAAC    |
| fragment #2           | 2  | CTGCCTGCCTCCTCCCTCCA      | GGGCCCCCTCTGCCTACACT      |
| fragment #1           | 3  | GGAACGCGTCTCACCTGCCC      | CCAGCAGCCCCGCGCTATTT      |
|                       | 4  | CCCGCGCCTGCTTTGGAAGT      | GCCAGCGCGTGGTGTCTTAA      |
|                       | 5  | CACTCCGGCAGCATTGCCCA      | TGGCACAGCCAGGCCACATG      |
| intergenic            | 6  | GGTGGCTTGTAGAGCTGCGGT     | GGGGGCGCAACCTGGAGGTA      |
|                       | 7  | CCCAATCTCATCAAGCTGCCTTTG  | TGGAACCCTACAGGAGAACCCTTTG |
| TEE                   | 8  | AGGTTCTCCACTTGCTGCGGC     | GCATCCAAGCACGGAAGTGAACA   |
|                       | 9  | GCCCCATTACAGTCTCCAGTTACA  | TGCTTCGTTCCCTCACCTTCCCCA  |
|                       | 10 | TCCCACCGAACGCAAAACAGCT    | ACCGCTCCTGTGGCCAGAA       |
|                       | 11 | CTCGGAGGGATAAGCTCTCAAGTGT | TGCCTCTCTGGAACAACCCGGT    |
|                       | 12 | AGGGCTGGCATCCTCGAGCA      | TGTGCCACAGCTTTTGGGCT      |
